# Supplementary material for: Adherence to Healthy Lifestyle and Attenuation of Biological Aging in Middle-Aged and Older Chinese Adults
Source: PubMed Central journal article supplement (PMC8599067; doi:10.1093/gerona/glab213), 2021-07-30
Supplement: glab213_suppl_supplementary_materials.pdf [file glab213_suppl_supplementary_materials.pdf]

## Supplementary material

### Adherence to healthy lifestyle and attenuation of biological aging in middle-aged and older Chinese adults

**Appendix** Members of the China Kadoorie Biobank collaborative group

**Table S1** List of 25 variables included in the FI

**Table S2** ICD-10 codes used to define the occurrence of disease from baseline to the 2<sup>nd</sup> resurvey

**Figure S1** Mean FI and frailty prevalence by age and sex among 25,040 participants

**Table S3** Association between FI and total mortality among 25,040 participants

**Table S4** Frailty transitions from baseline to the 2<sup>nd</sup> resurvey

**Table S5** Mean FI value change per 5 years and mean FI value at the 2<sup>nd</sup> resurvey by baseline frailty status and lifestyle factors

**Table S6** Mean FI value change per 5 years and mean FI value at the 2<sup>nd</sup> resurvey by baseline frailty status and lifestyle change between baseline and the 2<sup>nd</sup> resurvey

**Table S7** Association between baseline lifestyle factors and frailty transitions from baseline to the 2<sup>nd</sup> resurvey among baseline robust participants by gender

**Table S8** Association of lifestyle changes with frailty transitions from baseline to the 2<sup>nd</sup> resurvey among baseline robust participants by gender

**Table S9** Association between baseline lifestyle factors and frailty transitions by not including follow-up information to supplement diseases status at the second resurvey

**Table S10** Association between lifestyle changes and frailty transitions by not including follow-up information to supplement diseases status at the second resurvey

**Table S11** Association of baseline lifestyle factors with prefrail regression and prefrail worsening

**Table S12** Association of lifestyle changes with prefrail regression and prefrail worsening

## **Appendix Members of the China Kadoorie Biobank collaborative group**

**International Steering Committee:** Junshi Chen, Zhengming Chen (PI), Robert Clarke, Rory Collins, Yu Guo, Liming Li (PI), Jun Lv, Richard Peto, Robin Walters. **International Co-ordinating Centre, Oxford:** Daniel Avery, Ruth Boxall, Derrick Bennett, Yumei Chang, Yiping Chen, Zhengming Chen, Robert Clarke, Huaidong Du, Simon Gilbert, Alex Hacker, Mike Hill, Michael Holmes, Andri Iona, Christiana Kartsonaki, Rene Kerosi, Ling Kong, Om Kurmi, Garry Lancaster, Sarah Lewington, Kuang Lin, John McDonnell, Iona Millwood, Qunhua Nie, Jayakrishnan Radhakrishnan, Paul Ryder, Sam Sansome, Dan Schmidt, Paul Sherliker, Rajani Sohoni, Becky Stevens, Iain Turnbull, Robin Walters, Jenny Wang, Lin Wang, Neil Wright, Ling Yang, Xiaoming Yang. **National Co-ordinating Centre, Beijing:** Zheng Bian, Yu Guo, Xiao Han, Can Hou, Jun Lv, Pei Pei, Chao Liu, Canqing Yu. **10 Regional Co-ordinating Centres: Qingdao CDC:** Zengchang Pang, Ruqin Gao, Shanpeng Li, Shaojie Wang, Yongmei Liu, Ranran Du, Yajing Zang, Liang Cheng, Xiaocao Tian, Hua Zhang, Yaoming Zhai, Feng Ning, Xiaohui Sun, Feifei Li. **Licang CDC:** Silu Lv, Junzheng Wang, Wei Hou. **Heilongjiang Provincial CDC:** Mingyuan Zeng, Ge Jiang, Xue Zhou. **Nangang CDC:** Liqiu Yang, Hui He, Bo Yu, Yanjie Li, Qinai Xu, Quan Kang, Ziyang Guo. **Hainan Provincial CDC:** Dan Wang, Ximin Hu, Jinyan Chen, Yan Fu, Zhenwang Fu, Xiaohuan Wang. **Meilan CDC:** Min Weng, Zhendong Guo, Shukuan Wu, Yilei Li, Huimei Li, Zhifang Fu. **Jiangsu Provincial CDC:** Ming Wu, Yonglin Zhou, Jinyi Zhou, Ran Tao, Jie Yang, Jian Su. **Suzhou CDC:** Fang liu, Jun Zhang, Yihe Hu, Yan Lu, , Liangcai Ma, Aiyu Tang, Shuo Zhang, Jianrong Jin, Jingchao Liu. **Guangxi Provincial CDC:** Zhenzhu Tang, Naying Chen, Ying Huang. **Liuzhou CDC:** Mingqiang Li, Jinhuai Meng, Rong Pan, Qilian Jiang, Jian Lan, Yun Liu, Liuping Wei, Liyuan Zhou, Ningyu Chen Ping Wang, Fanwen Meng, Yulu Qin,, Sisi Wang. **Sichuan Provincial CDC:** Xianping Wu, Ningmei Zhang, Xiaofang Chen, Weiwei Zhou. **Pengzhou CDC:** Guojin Luo, Jianguo Li, Xiaofang Chen, Xunfu Zhong, Jiaqiu Liu, Qiang Sun. **Gansu Provincial CDC:** Pengfei Ge, Xiaolan Ren, Caixia Dong. **Maiji CDC:** Hui Zhang, Enke Mao, Xiaoping Wang, Tao Wang, Xi zhang. **Henan Provincial CDC:** Ding Zhang, Gang Zhou, Shixian Feng, Liang Chang, Lei Fan. **Huixian CDC:** Yulian Gao, Tianyou He, Huarong Sun, Pan He, Chen Hu, Xukui Zhang, Huifang Wu, Pan He. **Zhejiang Provincial CDC:** Min Yu, Ruying Hu, Hao Wang. **Tongxiang CDC:** Yijian Qian, Chunmei Wang, Kaixu Xie, Lingli Chen, Yidan Zhang, Dongxia Pan, Qijun Gu. **Hunan Provincial CDC:** Yuelong Huang, Biyun Chen, Li Yin, Huilin Liu, Zhongxi Fu, Qiaohua Xu. **Liuyang CDC:** Xin Xu, Hao Zhang, Huajun Long, Xianzhi Li, Libo Zhang, Zhe Qiu.

**Table S1 List of 25 variables included in the FI**

| No. | Definition according to baseline self-report and/or measurement                                                                                                                                                                                                                                                                                   | Coding of variables                         |
|-----|---------------------------------------------------------------------------------------------------------------------------------------------------------------------------------------------------------------------------------------------------------------------------------------------------------------------------------------------------|---------------------------------------------|
| 1   | Self-reported doctor diagnosis of hypertension, self-reported use of antihypertension drugs, measured SBP $\geq 140$ mmHg, or measured DBP $\geq 90$ mmHg                                                                                                                                                                                         | Yes = 1, No = 0                             |
| 2   | Self-reported doctor diagnosis of heart disease                                                                                                                                                                                                                                                                                                   | Yes = 1, No = 0                             |
| 3   | Self-reported doctor diagnosis of stroke or transient ischemic attack                                                                                                                                                                                                                                                                             | Yes = 1, No = 0                             |
| 4   | Self-reported doctor diagnosis of emphysema or chronic bronchitis                                                                                                                                                                                                                                                                                 | Yes = 1, No = 0                             |
| 5   | Self-reported doctor diagnosis of tuberculosis                                                                                                                                                                                                                                                                                                    | Yes = 1, No = 0                             |
| 6   | Self-reported doctor diagnosis of asthma                                                                                                                                                                                                                                                                                                          | Yes = 1, No = 0                             |
| 7   | Self-reported doctor diagnosis of peptic ulcer                                                                                                                                                                                                                                                                                                    | Yes = 1, No = 0                             |
| 8   | Self-reported doctor diagnosis of gallstone disease, with or without cholecystitis complication                                                                                                                                                                                                                                                   | Yes = 1, No = 0                             |
| 9   | Self-reported doctor diagnosis of rheumatoid arthritis                                                                                                                                                                                                                                                                                            | Yes = 1, No = 0                             |
| 10  | Self-reported doctor diagnosis of fracture                                                                                                                                                                                                                                                                                                        | Yes = 1, No = 0                             |
| 11  | Self-reported doctor diagnosis of neurasthenia                                                                                                                                                                                                                                                                                                    | Yes = 1, No = 0                             |
| 12  | Self-reported doctor diagnosis of diabetes, measured fasting blood glucose $\geq 7.0$ mmol/L, or measured random blood glucose $\geq 11.1$ mmol/L                                                                                                                                                                                                 | Yes = 1, No = 0                             |
| 13  | Self-reported doctor diagnosis of cancer                                                                                                                                                                                                                                                                                                          | Yes = 1, No = 0                             |
| 14  | Self-reported doctor diagnosis of chronic kidney disease                                                                                                                                                                                                                                                                                          | Yes = 1, No = 0                             |
| 15  | If you were walking on level ground with other healthy people of the same age, would you usually become short of breath or slow down due to chest discomfort?                                                                                                                                                                                     | Yes = 1, No = 0                             |
| 16  | During the past month, did you have any of the following for $\geq 3$ days each week: (1) taking $>30$ minutes to fall asleep after going bed or waking up in the middle of the night; (2) waking up early and not being able to go back to sleep; or (3) having difficulty staying alert while at work, eating or meeting people during daytime? | Yes = 1, No = 0                             |
| 17  | How often do you have bowel movements each week?                                                                                                                                                                                                                                                                                                  | Less than 3 times a week = 1,<br>Others = 0 |

| No. | Definition according to baseline self-report and/or measurement                                                                   | Coding of variables                                                     |
|-----|-----------------------------------------------------------------------------------------------------------------------------------|-------------------------------------------------------------------------|
| 18  | During the past 12 months, did you have a pain or discomfort in your body lasting $\geq 3$ months that interfered with your life? | Yes = 1, No = 0                                                         |
| 19  | During the past 12 months, have you usually coughed frequently?                                                                   | Yes, for $\geq 3$ months = 1,<br>Yes, for $< 3$ months = 0.5,<br>No = 0 |
| 20  | Brush teeth rarely or never, or have false teeth                                                                                  | Yes = 1, No = 0                                                         |
| 21  | During the past 12 months, have you lost weight $\geq 2.5$ kg and not tried to reduce weight intentionally?                       | Yes = 1, No = 0                                                         |
| 22  | During the past 12 months, did you feel much more sad, or depressed than usual for two or more weeks?                             | Yes = 1, No = 0                                                         |
| 23  | How is your current general health status?                                                                                        | Poor = 1,<br>Fair = 0.5,<br>Good = 0.25,<br>Excellent = 0               |
| 24  | Measured heart rate                                                                                                               | $< 60$ or $> 100$ = 1,<br>$\geq 60$ and $\leq 100$ = 0                  |
| 25  | The ratio of measured forced expiratory volume in 1 s over measured forced vital capacity (FEV <sub>1</sub> /FVC) $< 0.7$         | Yes = 1, No = 0                                                         |

**Table S2 ICD-10 codes used to define the occurrence of disease from baseline to the 2<sup>nd</sup> resurvey**

| <b>Diseases</b>                 | <b>ICD-10 codes</b>                                                                                           |
|---------------------------------|---------------------------------------------------------------------------------------------------------------|
| Hypertension                    | I10-I15                                                                                                       |
| Heart disease                   | I20-I25                                                                                                       |
| Stroke                          | I60-I61, I63-I64                                                                                              |
| Emphysema or chronic bronchitis | J41-J44                                                                                                       |
| Tuberculosis                    | A15-A19.9, B90-B90.9, J65, K23.0, K67.3, K93.0, M01.1, M49.0, M90.0, N33.0, N74.0, N74.1, O98.0, P37.0, U84.3 |
| Asthma                          | J45-J46                                                                                                       |
| Peptic ulcer                    | K25-K28                                                                                                       |
| Gallstone disease               | K80-K81                                                                                                       |
| Rheumatoid arthritis            | M05, M06, M45                                                                                                 |
| Fracture                        | S02, S12, S22, S32, S42, S52, S62, S72, S82, S92, T02, T08, T10, T12, T14.2                                   |
| Neurasthenia                    | F48.0                                                                                                         |
| Diabetes                        | E10-E14                                                                                                       |
| Cancer                          | C00-C97                                                                                                       |
| Chronic kidney disease          | D63.1, E10.2, E11.2, I12-I13.9, N02-N08.8, N15.0, N18-N18.9, Q61-Q62.8, N11                                   |

**Figure S1 Mean FI and frailty prevalence by age and sex among 25,040 participants**

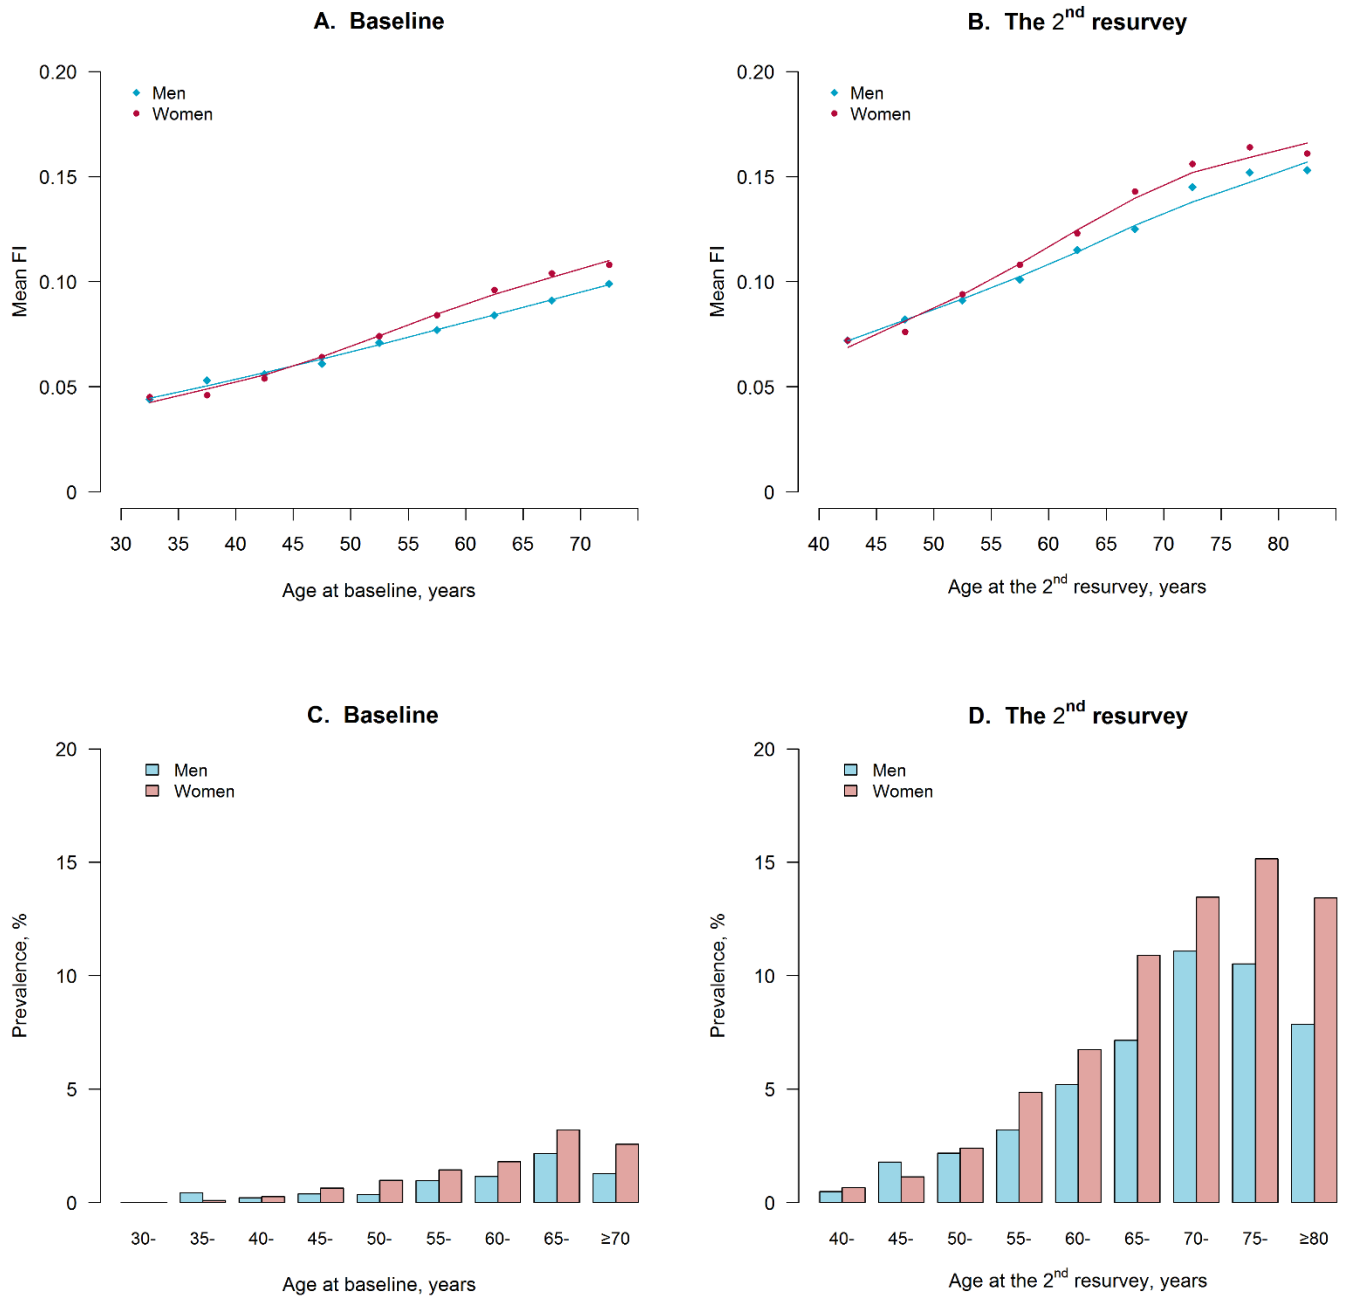

**Table S3 Association between FI and total mortality among 25,040 participants**

|                                                                  | Death | Death rate<br>(/1000 PYs) | HR (95% CI)             |
|------------------------------------------------------------------|-------|---------------------------|-------------------------|
| <b>Frailty status at baseline<sup>a</sup></b>                    |       |                           |                         |
| Robust                                                           | 448   | 2.1                       | 1.00                    |
| Prefrail                                                         | 418   | 4.9                       | 1.40 (1.22-1.61)        |
| Frail                                                            | 32    | 11.9                      | 2.58 (1.78-3.75)        |
| <i>Per 0.1 increment of FI</i>                                   |       |                           | <i>1.43 (1.29-1.59)</i> |
| <b>Frailty status at the 2<sup>nd</sup> resurvey<sup>b</sup></b> |       |                           |                         |
| Robust                                                           | 171   | 3.8                       | 1.00                    |
| Prefrail                                                         | 583   | 12.7                      | 1.90 (1.59-2.27)        |
| Frail                                                            | 144   | 27.2                      | 2.90 (2.28-3.68)        |
| <i>Per 0.1 increment of FI</i>                                   |       |                           | <i>1.54 (1.42-1.66)</i> |

Cox models were stratified by age, sex, and study area, with age as the time scale. Multivariable models were adjusted for age (year), education level (no formal school, primary school, middle school, high school, college, or university or higher), smoking status (non-smoker, former smoker who had stopped for reasons other than illness, current smoker or former smoker who had stopped due to illness: 1-14, 15-24, or  $\geq 25$  cigarettes or equivalent per day), alcohol consumption (non-drinking, former drinker, current weekly drinker or drinking  $< 30$  g/d of pure alcohol in men or  $< 15$  g/d in women, drinking  $\geq 30$  g/d of pure alcohol in men or  $\geq 15$  g/d in women), intake frequency of fresh fruit, vegetables and red meat (days/week: calculated by assigning participants to the midpoint of their consumption category), physical activity (MET-hours/day), body-mass index ( $\text{kg}/\text{m}^2$ ), and waist-hip ratio.

<sup>a</sup>The death number refers to death from baseline to the date of December 31, 2017, with the mean follow-up time of 11.8 years.

<sup>b</sup>The death number refers to death from the 2<sup>nd</sup> resurvey to the date of December 31, 2017, with the mean follow-up time of 3.8 years.

PY = person-year; HR = hazard ratio; CI = confidence interval.

**Table S4 Frailty transitions from baseline to the 2<sup>nd</sup> resurvey**

| <b>Baseline</b> | <b>The 2<sup>nd</sup> resurvey</b> |              |             |       |
|-----------------|------------------------------------|--------------|-------------|-------|
|                 | Robust                             | Prefrail     | Frail       | Total |
| Robust          | 9756 (55.2%)                       | 7426 (42.0%) | 490 (2.8%)  | 17672 |
| Prefrail        | 1808 (25.3%)                       | 4489 (62.9%) | 844 (11.8%) | 7141  |
| Total           | 11564                              | 11915        | 1334        | 24813 |

The numbers in brackets indicate the percentage of frailty status at the 2<sup>nd</sup> resurvey by baseline status.



**Table S5 Mean FI value change per 5 years and mean FI value at the 2<sup>nd</sup> resurvey by baseline frailty status and lifestyle factors**

|                                  | Baseline robust |                             |                                     | Baseline prefrail |                             |                                     |
|----------------------------------|-----------------|-----------------------------|-------------------------------------|-------------------|-----------------------------|-------------------------------------|
|                                  | Number          | FI value change per 5 years | Mean FI at 2 <sup>nd</sup> resurvey | Number            | FI value change per 5 years | Mean FI at 2 <sup>nd</sup> resurvey |
| Total                            | 17672           | 0.034                       | 0.095                               | 7141              | 0.009                       | 0.151                               |
| Smoking status                   |                 |                             |                                     |                   |                             |                                     |
| Non-smoking                      | 12349           | 0.032                       | 0.092                               | 5002              | 0.008                       | 0.148                               |
| Former smoker <sup>a</sup>       | 468             | 0.036                       | 0.098                               | 183               | 0.013                       | 0.156                               |
| 1-14 cig/d                       | 1700            | 0.035                       | 0.098                               | 722               | 0.012                       | 0.152                               |
| 15-24 cig/d                      | 2240            | 0.037                       | 0.101                               | 840               | 0.012                       | 0.156                               |
| ≥25 cig/d                        | 915             | 0.041                       | 0.108                               | 394               | 0.015                       | 0.164                               |
| Alcohol consumption              |                 |                             |                                     |                   |                             |                                     |
| Non-drinking                     | 14460           | 0.033                       | 0.095                               | 5818              | 0.009                       | 0.150                               |
| Former drinker                   | 509             | 0.035                       | 0.103                               | 395               | 0.008                       | 0.158                               |
| Weekly or <15/30g/d <sup>b</sup> | 1471            | 0.032                       | 0.094                               | 514               | 0.010                       | 0.151                               |
| ≥15/30g/d                        | 1232            | 0.035                       | 0.099                               | 414               | 0.013                       | 0.153                               |
| Eating fruit and vegetables      |                 |                             |                                     |                   |                             |                                     |
| Daily                            | 3140            | 0.030                       | 0.089                               | 1114              | 0.007                       | 0.147                               |
| Less than daily                  | 14532           | 0.034                       | 0.096                               | 6027              | 0.010                       | 0.151                               |
| Physical activity (MET-h/day)    |                 |                             |                                     |                   |                             |                                     |
| Quartile1 (Lowest)               | 3653            | 0.035                       | 0.098                               | 2201              | 0.011                       | 0.155                               |
| Q2                               | 4434            | 0.033                       | 0.095                               | 1860              | 0.008                       | 0.149                               |
| Q3                               | 4661            | 0.033                       | 0.094                               | 1639              | 0.010                       | 0.149                               |
| Q4 (Highest)                     | 4924            | 0.033                       | 0.093                               | 1441              | 0.009                       | 0.149                               |
| BMI (kg/m <sup>2</sup> )         |                 |                             |                                     |                   |                             |                                     |
| <18.5                            | 658             | 0.032                       | 0.093                               | 296               | 0                           | 0.139                               |
| 18.5-23.9                        | 9383            | 0.031                       | 0.090                               | 3447              | 0.007                       | 0.146                               |
| 24.0-27.9                        | 5880            | 0.035                       | 0.098                               | 2451              | 0.011                       | 0.153                               |
| ≥28.0                            | 1751            | 0.042                       | 0.112                               | 947               | 0.017                       | 0.166                               |
| WHR                              |                 |                             |                                     |                   |                             |                                     |
| Men <0.90, women <0.85           | 8146            | 0.031                       | 0.089                               | 2723              | 0.006                       | 0.144                               |
| Men 0.90-0.94, women 0.85-0.89   | 5586            | 0.034                       | 0.095                               | 2214              | 0.010                       | 0.149                               |
| Men ≥0.95, women ≥0.90           | 3940            | 0.039                       | 0.106                               | 2204              | 0.014                       | 0.160                               |

<sup>a</sup>Former smoker refers to those stopped smoking for reasons other than illness. Those who stopped smoking due to illness were classified as daily smoker.

<sup>b</sup>Drinking < 30 g/d of pure alcohol in men or < 15 g/d in women.

The FI value was adjusted for age, sex, and 10 study area.

Abbreviations as in Table 1.

**Table S6 Mean FI value change per 5 years and mean FI value at the 2<sup>nd</sup> resurvey by baseline frailty status and lifestyle change between baseline and the 2<sup>nd</sup> resurvey**

|                                                  | Baseline robust |                             |                                     | Baseline prefrail |                             |                                     |
|--------------------------------------------------|-----------------|-----------------------------|-------------------------------------|-------------------|-----------------------------|-------------------------------------|
|                                                  | Number          | FI value change per 5 years | Mean FI at 2 <sup>nd</sup> resurvey | Number            | FI value change per 5 years | Mean FI at 2 <sup>nd</sup> resurvey |
| Smoking status                                   |                 |                             |                                     |                   |                             |                                     |
| Constant non-smoking <sup>a</sup>                | 12553           | 0.032                       | 0.093                               | 5087              | 0.008                       | 0.148                               |
| Fluctuating status                               | 1194            | 0.035                       | 0.098                               | 535               | 0.013                       | 0.157                               |
| <i>Desirable transition</i> <sup>b</sup>         | 930             | 0.034                       | 0.098                               | 437               | 0.011                       | 0.154                               |
| <i>Undesirable transition</i> <sup>c</sup>       | 264             | 0.036                       | 0.097                               | 98                | 0.022                       | 0.170                               |
| Constant smoking                                 | 3925            | 0.038                       | 0.101                               | 1519              | 0.013                       | 0.157                               |
| Alcohol consumption                              |                 |                             |                                     |                   |                             |                                     |
| Constant non-heavy alcohol drinking <sup>d</sup> | 14999           | 0.033                       | 0.094                               | 5929              | 0.009                       | 0.149                               |
| Fluctuating status                               | 1652            | 0.036                       | 0.101                               | 765               | 0.012                       | 0.156                               |
| <i>Desirable transition</i>                      | 720             | 0.035                       | 0.100                               | 362               | 0.007                       | 0.151                               |
| <i>Undesirable transition</i>                    | 932             | 0.036                       | 0.101                               | 403               | 0.017                       | 0.161                               |
| Constant heavy alcohol drinking                  | 1021            | 0.036                       | 0.101                               | 447               | 0.015                       | 0.161                               |
| Eating fruit and vegetables                      |                 |                             |                                     |                   |                             |                                     |
| Constant daily eating                            | 2330            | 0.028                       | 0.084                               | 795               | 0.006                       | 0.143                               |
| Fluctuating status                               | 4739            | 0.033                       | 0.095                               | 1695              | 0.008                       | 0.150                               |
| <i>Desirable transition</i>                      | 3929            | 0.033                       | 0.095                               | 1376              | 0.008                       | 0.150                               |
| <i>Undesirable transition</i>                    | 810             | 0.035                       | 0.098                               | 319               | 0.009                       | 0.153                               |
| Constant non-daily eating                        | 10603           | 0.035                       | 0.097                               | 4651              | 0.011                       | 0.152                               |
| Physical activity                                |                 |                             |                                     |                   |                             |                                     |
| Constant being physically active <sup>e</sup>    | 6325            | 0.032                       | 0.091                               | 1747              | 0.007                       | 0.145                               |
| Fluctuating status                               | 6434            | 0.034                       | 0.095                               | 2545              | 0.010                       | 0.150                               |
| <i>Desirable transition</i>                      | 3174            | 0.033                       | 0.092                               | 1212              | 0.009                       | 0.148                               |
| <i>Undesirable transition</i>                    | 3260            | 0.034                       | 0.097                               | 1333              | 0.011                       | 0.152                               |
| Constant low physical activity                   | 4913            | 0.036                       | 0.100                               | 2849              | 0.010                       | 0.155                               |
| BMI (kg/m <sup>2</sup> )                         |                 |                             |                                     |                   |                             |                                     |
| Constant healthy BMI <sup>f</sup>                | 7072            | 0.032                       | 0.090                               | 2572              | 0.007                       | 0.146                               |
| Fluctuating status                               | 3461            | 0.033                       | 0.095                               | 1392              | 0.008                       | 0.149                               |
| <i>Desirable transition</i>                      | 1150            | 0.038                       | 0.104                               | 517               | 0.011                       | 0.155                               |
| <i>Undesirable transition</i>                    | 2311            | 0.030                       | 0.090                               | 875               | 0.006                       | 0.146                               |
| Constant unhealthy BMI                           | 7139            | 0.036                       | 0.100                               | 3177              | 0.012                       | 0.155                               |
| WHR                                              |                 |                             |                                     |                   |                             |                                     |
| Constant healthy WHR <sup>g</sup>                | 4454            | 0.031                       | 0.088                               | 1507              | 0.006                       | 0.144                               |
| Fluctuating status                               | 4947            | 0.032                       | 0.092                               | 1817              | 0.007                       | 0.146                               |
| <i>Desirable transition</i>                      | 1255            | 0.035                       | 0.096                               | 601               | 0.010                       | 0.149                               |
| <i>Undesirable transition</i>                    | 3692            | 0.031                       | 0.090                               | 1216              | 0.005                       | 0.144                               |
| Constant unhealthy WHR                           | 8271            | 0.036                       | 0.100                               | 3817              | 0.012                       | 0.155                               |

<sup>a</sup>Non-smoking refers to never smoking or having stopped for reasons other than illness.

<sup>b</sup>Desirable transition refers to transition from unhealthy lifestyle at baseline to healthy lifestyle at the 2<sup>nd</sup> resurvey.

<sup>c</sup>Undesirable transition refers to transition from healthy lifestyle at baseline to unhealthy lifestyle at the 2<sup>nd</sup> resurvey.

<sup>d</sup>Heavy alcohol drinking refers to drinking  $\geq 30$  g/d of pure alcohol in men or  $\geq 15$  g/d in women or ex-drinkers.

<sup>e</sup>Being physically active refers to being sex-specific upper 50% of the physical activity level.

<sup>f</sup>Healthy BMI refers to 18.5-23.9 kg/m<sup>2</sup>.

<sup>g</sup>Healthy WHR refers to WHR <0.90 in men or <0.85 in women.

The FI value was adjusted for age, sex, and 10 study area.

Abbreviations as in Table 1.

**Table S7 Association between baseline lifestyle factors and frailty transitions from baseline to the 2<sup>nd</sup> resurvey among baseline robust participants by gender**

|                                  | Men   |                  | Women |                  | P <sub>interaction</sub> |
|----------------------------------|-------|------------------|-------|------------------|--------------------------|
|                                  | Cases | OR (95% CI)      | Cases | OR (95% CI)      |                          |
| Smoking status <sup>a</sup>      |       |                  |       |                  | 0.003                    |
| Non-smoking                      | 727   | 1.00             | 4743  | 1.00             |                          |
| Former smoker                    | 210   | 1.10 (0.88-1.38) | 15    | 1.96 (0.71-5.38) |                          |
| 1-14 cig/d                       | 692   | 1.17 (1.01-1.36) | 97    | 0.74 (0.54-1.01) |                          |
| 15-24 cig/d                      | 992   | 1.35 (1.18-1.55) | -     | -                |                          |
| ≥25 cig/d                        | 440   | 1.56 (1.31-1.86) | -     | -                |                          |
| Alcohol consumption              |       |                  |       |                  | 0.001                    |
| Non-drinking                     | 1778  | 1.00             | 4716  | 1.00             |                          |
| Former drinker                   | 241   | 1.33 (1.08-1.64) | 22    | 0.48 (0.28-0.81) |                          |
| Weekly or <15/30g/d <sup>b</sup> | 544   | 0.89 (0.78-1.03) | 69    | 1.01 (0.71-1.43) |                          |
| ≥15/30g/d                        | 498   | 1.01 (0.87-1.18) | 48    | 1.53 (0.97-2.42) |                          |
| Eating fruit and vegetables      |       |                  |       |                  | 0.502                    |
| Daily                            | 367   | 1.00             | 945   | 1.00             |                          |
| Less than daily                  | 2694  | 1.29 (1.10-1.52) | 3910  | 1.19 (1.06-1.34) |                          |
| Physical activity (MET-h/day)    |       |                  |       |                  | 0.479                    |
| Quartile1 (Lowest)               | 741   | 1.06 (0.89-1.25) | 1204  | 1.13 (0.99-1.29) |                          |
| Q2                               | 809   | 0.92 (0.79-1.07) | 1274  | 1.11 (0.98-1.26) |                          |
| Q3                               | 756   | 1.00 (0.87-1.16) | 1212  | 1.04 (0.92-1.16) |                          |
| Q4 (Highest)                     | 755   | 1.00             | 1165  | 1.00             |                          |
| BMI (kg/m <sup>2</sup> )         |       |                  |       |                  | 0.745                    |
| <18.5                            | 131   | 1.26 (0.96-1.67) | 186   | 1.10 (0.89-1.36) |                          |
| 18.5-23.9                        | 1590  | 1.00             | 2317  | 1.00             |                          |
| 24.0-27.9                        | 1026  | 1.13 (1.00-1.29) | 1698  | 1.13 (1.03-1.24) |                          |
| ≥28.0                            | 314   | 1.46 (1.18-1.79) | 654   | 1.59 (1.37-1.85) |                          |
| WHR                              |       |                  |       |                  | 0.958                    |
| Men <0.90, women <0.85           | 1470  | 1.00             | 1799  | 1.00             |                          |
| Men 0.90-0.94, women 0.85-0.89   | 875   | 1.14 (1.01-1.30) | 1642  | 1.11 (1.00-1.22) |                          |
| Men ≥0.95, women ≥0.90           | 716   | 1.40 (1.20-1.64) | 1414  | 1.31 (1.16-1.47) |                          |

<sup>a</sup>Former smoker refers to those stopped smoking for reasons other than illness. Those who stopped smoking due to illness were classified as daily smoker. For women, we combined 1-14 cig/d, 15-24 cig/d, and ≥25 cig/d into daily smoker, since limited number of daily smokers in women.

<sup>b</sup>Drinking < 30 g/d of pure alcohol in men or < 15 g/d in women.

Multivariable model was adjusted for age, 10 study area, education, and lifestyle factors listed in the table. Abbreviations as in Table 1.

**Table S8 Association of lifestyle changes with frailty transitions from baseline to the 2<sup>nd</sup> resurvey among baseline robust participants by gender**

|                                                  | Men   |                  | Women |                  | P <sub>interaction</sub> |
|--------------------------------------------------|-------|------------------|-------|------------------|--------------------------|
|                                                  | Cases | OR (95% CI)      | Cases | OR (95% CI)      |                          |
| Smoking status                                   |       |                  |       |                  | 0.339                    |
| Constant non-smoking <sup>a</sup>                | 834   | 1.00             | 4745  | 1.00             |                          |
| Fluctuating status                               | 506   | 1.14 (0.98-1.34) | 41    | 0.66 (0.43-1.03) |                          |
| Constant smoking                                 | 1721  | 1.28 (1.14-1.45) | 69    | 0.82 (0.57-1.18) |                          |
| Alcohol consumption                              |       |                  |       |                  | 0.160                    |
| Constant non-heavy alcohol drinking <sup>b</sup> | 1965  | 1.00             | 4709  | 1.00             |                          |
| Fluctuating status                               | 660   | 1.13 (0.99-1.28) | 112   | 0.86 (0.66-1.13) |                          |
| Constant heavy alcohol drinking                  | 436   | 1.11 (0.95-1.30) | 34    | 1.47 (0.87-2.48) |                          |
| Eating fruit and vegetables                      |       |                  |       |                  | 0.086                    |
| Constant daily eating                            | 236   | 1.00             | 713   | 1.00             |                          |
| Fluctuating status                               | 761   | 1.35 (1.10-1.66) | 1363  | 1.28 (1.11-1.47) |                          |
| Constant non-daily eating                        | 2064  | 1.48 (1.20-1.81) | 2779  | 1.30 (1.12-1.50) |                          |
| Physical activity                                |       |                  |       |                  | 0.650                    |
| Constant being physically active <sup>c</sup>    | 928   | 1.00             | 1409  | 1.00             |                          |
| Fluctuating status                               | 1065  | 1.03 (0.91-1.17) | 1794  | 1.14 (1.03-1.26) |                          |
| Constant low physical activity                   | 1068  | 1.13 (0.97-1.31) | 1652  | 1.31 (1.16-1.47) |                          |
| BMI (kg/m <sup>2</sup> )                         |       |                  |       |                  | 0.004                    |
| Constant healthy BMI <sup>d</sup>                | 1208  | 1.00             | 1778  | 1.00             |                          |
| Fluctuating status                               | 621   | 1.16 (1.01-1.34) | 897   | 0.96 (0.86-1.07) |                          |
| Constant unhealthy BMI                           | 1232  | 1.11 (0.97-1.27) | 2180  | 1.15 (1.04-1.27) |                          |
| WHR                                              |       |                  |       |                  | 0.059                    |
| Constant healthy WHR <sup>e</sup>                | 949   | 1.00             | 854   | 1.00             |                          |
| Fluctuating status                               | 825   | 1.07 (0.94-1.22) | 1236  | 1.00 (0.89-1.13) |                          |
| Constant unhealthy WHR                           | 1287  | 1.30 (1.14-1.49) | 2765  | 1.22 (1.09-1.37) |                          |

<sup>a</sup>Non-smoking refers to never smoking or having stopped for reasons other than illness.

<sup>b</sup>Heavy alcohol drinking refers to drinking  $\geq 30$  g/d of pure alcohol in men or  $\geq 15$  g/d in women or ex-drinkers.

<sup>c</sup>Being physically active refers to being sex-specific upper 50% of the physical activity level.

<sup>d</sup>Healthy BMI refers to 18.5-23.9 kg/m<sup>2</sup>.

<sup>e</sup>Healthy WHR refers to WHR  $< 0.90$  in men or  $< 0.85$  in women.

Multivariable model was adjusted for age, 10 study area, education, and lifestyle changes listed in the table. Abbreviations as in Table 1.

**Table S9 Association between baseline lifestyle factors and frailty transitions by not including follow-up information to supplement disease status at the second resurvey**

|                                      | Robust worsening |                  | Prefrail worsening |                  |
|--------------------------------------|------------------|------------------|--------------------|------------------|
|                                      | Cases            | OR (95% CI)      | Cases              | OR (95% CI)      |
| <b>Smoking status</b>                |                  |                  |                    |                  |
| Non-smoking                          | 5104             | 1.00             | 488                | 1.00             |
| Former smoker <sup>a</sup>           | 213              | 1.12 (0.90-1.38) | 27                 | 1.92 (1.17-3.15) |
| 1-14 cig/d                           | 716              | 1.09 (0.95-1.24) | 69                 | 1.19 (0.85-1.65) |
| 15-24 cig/d                          | 939              | 1.27 (1.11-1.44) | 63                 | 1.26 (0.87-1.80) |
| ≥25 cig/d                            | 412              | 1.46 (1.23-1.73) | 30                 | 1.39 (0.88-2.22) |
| <b>Alcohol consumption</b>           |                  |                  |                    |                  |
| Non-drinking                         | 6058             | 1.00             | 577                | 1.00             |
| Former drinker                       | 246              | 1.14 (0.94-1.38) | 33                 | 0.85 (0.57-1.26) |
| Weekly or <15/30g/d <sup>b</sup>     | 573              | 0.93 (0.82-1.05) | 44                 | 0.96 (0.67-1.37) |
| ≥15/30g/d                            | 507              | 1.01 (0.88-1.17) | 23                 | 0.71 (0.44-1.14) |
| <b>Eating fruit and vegetables</b>   |                  |                  |                    |                  |
| Daily                                | 1228             | 1.00             | 136                | 1.00             |
| Less than daily                      | 6156             | 1.22 (1.11-1.34) | 541                | 1.15 (0.91-1.46) |
| <b>Physical activity (MET-h/day)</b> |                  |                  |                    |                  |
| Quartile1 (Lowest)                   | 1819             | 1.10 (0.99-1.22) | 278                | 1.15 (0.86-1.54) |
| Q2                                   | 1962             | 1.05 (0.95-1.16) | 179                | 0.94 (0.70-1.27) |
| Q3                                   | 1838             | 1.03 (0.94-1.12) | 135                | 1.14 (0.85-1.52) |
| Q4 (Highest)                         | 1765             | 1.00             | 85                 | 1.00             |
| <b>BMI (kg/m<sup>2</sup>)</b>        |                  |                  |                    |                  |
| <18.5                                | 297              | 1.18 (1.00-1.39) | 22                 | 0.84 (0.53-1.34) |
| 18.5-23.9                            | 3636             | 1.00             | 283                | 1.00             |
| 24.0-27.9                            | 2530             | 1.10 (1.02-1.19) | 258                | 1.15 (0.94-1.40) |
| ≥28.0                                | 921              | 1.53 (1.36-1.73) | 114                | 1.14 (0.87-1.49) |
| <b>WHR</b>                           |                  |                  |                    |                  |
| Men <0.90, women <0.85               | 3029             | 1.00             | 222                | 1.00             |
| Men 0.90-0.94, women 0.85-0.89       | 2366             | 1.14 (1.06-1.23) | 201                | 1.01 (0.81-1.25) |
| Men ≥0.95, women ≥0.90               | 1989             | 1.34 (1.22-1.47) | 254                | 1.23 (0.98-1.55) |

<sup>a</sup>Former smoker refers to those stopped smoking for reasons other than illness. Those who stopped smoking due to illness were classified as daily smoker.

<sup>b</sup>Drinking < 30 g/d of pure alcohol in men or < 15 g/d in women.

Multivariable model was adjusted for age, sex, 10 study area, education, and lifestyle factors listed in the table.

Abbreviations as in Table 1.

**Table S10 Association between lifestyle changes and frailty transitions by not including follow-up information to supplement disease status at the second resurvey**

|                                                  | Robust worsening |                  | Prefrail worsening |                  |
|--------------------------------------------------|------------------|------------------|--------------------|------------------|
|                                                  | Cases            | OR (95% CI)      | Cases              | OR (95% CI)      |
| Smoking status                                   |                  |                  |                    |                  |
| Constant non-smoking <sup>a</sup>                | 5211             | 1.00             | 499                | 1.00             |
| Fluctuating status                               | 495              | 0.99 (0.86-1.15) | 56                 | 1.25 (0.88-1.78) |
| Constant smoking                                 | 1678             | 1.21 (1.09-1.36) | 122                | 1.17 (0.87-1.57) |
| Alcohol consumption                              |                  |                  |                    |                  |
| Constant non-heavy alcohol drinking <sup>b</sup> | 6220             | 1.00             | 578                | 1.00             |
| Fluctuating status                               | 724              | 1.09 (0.97-1.22) | 65                 | 1.00 (0.74-1.35) |
| Constant heavy alcohol drinking                  | 440              | 1.10 (0.95-1.27) | 34                 | 1.05 (0.71-1.57) |
| Eating fruit and vegetables                      |                  |                  |                    |                  |
| Constant daily eating                            | 880              | 1.00             | 97                 | 1.00             |
| Fluctuating status                               | 1991             | 1.32 (1.18-1.48) | 193                | 1.31 (0.99-1.73) |
| Constant non-daily eating                        | 4513             | 1.38 (1.23-1.55) | 387                | 1.21 (0.91-1.62) |
| Physical activity                                |                  |                  |                    |                  |
| Constant being physically active <sup>c</sup>    | 2177             | 1.00             | 101                | 1.00             |
| Fluctuating status                               | 2662             | 1.09 (1.01-1.17) | 224                | 1.09 (0.84-1.42) |
| Constant low physical activity                   | 2545             | 1.22 (1.11-1.33) | 352                | 1.14 (0.87-1.50) |
| BMI (kg/m <sup>2</sup> )                         |                  |                  |                    |                  |
| Constant healthy BMI <sup>d</sup>                | 2764             | 1.00             | 208                | 1.00             |
| Fluctuating status                               | 1442             | 1.08 (0.99-1.18) | 128                | 1.06 (0.83-1.34) |
| Constant unhealthy BMI                           | 3178             | 1.12 (1.04-1.21) | 341                | 1.14 (0.93-1.40) |
| WHR                                              |                  |                  |                    |                  |
| Constant healthy WHR <sup>e</sup>                | 1679             | 1.00             | 125                | 1.00             |
| Fluctuating status                               | 1912             | 1.02 (0.94-1.12) | 156                | 1.02 (0.78-1.32) |
| Constant unhealthy WHR                           | 3793             | 1.26 (1.15-1.37) | 396                | 1.18 (0.93-1.50) |

<sup>a</sup>Non-smoking refers to never smoking or having stopped for reasons other than illness.

<sup>b</sup>Heavy alcohol drinking refers to drinking  $\geq 30$  g/d of pure alcohol in men or  $\geq 15$  g/d in women or ex-drinkers.

<sup>c</sup>Being physically active refers to being sex-specific upper 50% of the physical activity level.

<sup>d</sup>Healthy BMI refers to 18.5-23.9 kg/m<sup>2</sup>.

<sup>e</sup>Healthy WHR refers to WHR  $< 0.90$  in men or  $< 0.85$  in women.

Multivariable model was adjusted for age, sex, 10 study area, education, and lifestyle changes listed in the table.

Abbreviations as in Table 1.

**Table S11 Association of baseline lifestyle factors with prefrail regression and prefrail worsening**

|                                      | Prefrail regression |                  | Prefrail worsening |                  |
|--------------------------------------|---------------------|------------------|--------------------|------------------|
|                                      | Cases               | OR (95% CI)      | Cases              | OR (95% CI)      |
| <b>Smoking status</b>                |                     |                  |                    |                  |
| Non-smoking                          | 1270                | 1.00             | 600                | 1.00             |
| Former smoker <sup>a</sup>           | 43                  | 1.24 (0.83-1.87) | 30                 | 1.86 (1.16-3.00) |
| 1-14 cig/d                           | 173                 | 1.03 (0.82-1.31) | 91                 | 1.32 (0.97-1.79) |
| 15-24 cig/d                          | 219                 | 0.93 (0.74-1.18) | 84                 | 1.38 (0.99-1.91) |
| ≥25 cig/d                            | 103                 | 0.92 (0.68-1.24) | 39                 | 1.44 (0.94-2.19) |
| <b>Alcohol consumption</b>           |                     |                  |                    |                  |
| Non-drinking                         | 1468                | 1.00             | 717                | 1.00             |
| Former drinker                       | 87                  | 0.84 (0.64-1.11) | 46                 | 0.90 (0.63-1.28) |
| Weekly or <15/30g/d <sup>b</sup>     | 143                 | 1.05 (0.83-1.33) | 49                 | 0.84 (0.59-1.18) |
| ≥15/30g/d                            | 110                 | 0.81 (0.62-1.05) | 32                 | 0.73 (0.48-1.10) |
| <b>Eating fruit and vegetables</b>   |                     |                  |                    |                  |
| Daily                                | 242                 | 1.00             | 155                | 1.00             |
| Less than daily                      | 1566                | 0.93 (0.77-1.12) | 689                | 1.21 (0.97-1.52) |
| <b>Physical activity (MET-h/day)</b> |                     |                  |                    |                  |
| Quartile1 (Lowest)                   | 381                 | 0.84 (0.70-1.01) | 335                | 1.02 (0.78-1.33) |
| Q2                                   | 459                 | 1.10 (0.92-1.30) | 227                | 0.94 (0.72-1.24) |
| Q3                                   | 498                 | 1.08 (0.92-1.27) | 170                | 1.11 (0.85-1.45) |
| Q4 (Highest)                         | 470                 | 1.00             | 112                | 1.00             |
| <b>BMI (kg/m<sup>2</sup>)</b>        |                     |                  |                    |                  |
| <18.5                                | 84                  | 1.13 (0.85-1.50) | 30                 | 0.89 (0.59-1.35) |
| 18.5-23.9                            | 970                 | 1.00             | 354                | 1.00             |
| 24.0-27.9                            | 576                 | 0.88 (0.77-1.01) | 317                | 1.15 (0.96-1.38) |
| ≥28.0                                | 178                 | 0.73 (0.59-0.91) | 143                | 1.18 (0.92-1.51) |
| <b>WHR</b>                           |                     |                  |                    |                  |
| Men <0.90, women <0.85               | 788                 | 1.00             | 278                | 1.00             |
| Men 0.90-0.94, women 0.85-0.89       | 564                 | 0.89 (0.77-1.02) | 247                | 0.96 (0.79-1.18) |
| Men ≥0.95, women ≥0.90               | 456                 | 0.79 (0.67-0.93) | 319                | 1.15 (0.93-1.42) |

<sup>a</sup>Former smoker refers to those stopped smoking for reasons other than illness. Those who stopped smoking due to illness were classified as daily smoker.

<sup>b</sup>Drinking < 30 g/d of pure alcohol in men or < 15 g/d in women.

Multivariable model was adjusted for age, sex, 10 study area, education, and lifestyle factors listed in the table. The reference group was those remain prefrail.



**Table S12 Association of lifestyle changes with prefrail regression and prefrail worsening**

|                                                  | Prefrail regression |                  | Prefrail worsening |                  |
|--------------------------------------------------|---------------------|------------------|--------------------|------------------|
|                                                  | Cases               | OR (95% CI)      | Cases              | OR (95% CI)      |
| Smoking status                                   |                     |                  |                    |                  |
| Constant non-smoking <sup>a</sup>                | 1292                | 1.00             | 613                | 1.00             |
| Fluctuating status                               | 123                 | 0.96 (0.74-1.25) | 75                 | 1.40 (1.02-1.92) |
| Constant smoking                                 | 393                 | 0.92 (0.75-1.12) | 156                | 1.20 (0.91-1.58) |
| Alcohol consumption                              |                     |                  |                    |                  |
| Constant non-heavy alcohol drinking <sup>b</sup> | 1509                | 1.00             | 713                | 1.00             |
| Fluctuating status                               | 194                 | 0.96 (0.78-1.17) | 85                 | 1.03 (0.79-1.36) |
| Constant heavy alcohol drinking                  | 105                 | 0.78 (0.60-1.01) | 46                 | 1.08 (0.75-1.54) |
| Eating fruit and vegetables                      |                     |                  |                    |                  |
| Constant daily eating                            | 173                 | 1.00             | 111                | 1.00             |
| Fluctuating status                               | 414                 | 0.86 (0.68-1.08) | 223                | 1.26 (0.96-1.65) |
| Constant non-daily eating                        | 1221                | 0.84 (0.67-1.05) | 510                | 1.29 (0.98-1.70) |
| Physical activity                                |                     |                  |                    |                  |
| Constant being physically active <sup>c</sup>    | 611                 | 1.00             | 127                | 1.00             |
| Fluctuating status                               | 689                 | 0.98 (0.85-1.13) | 287                | 1.10 (0.87-1.39) |
| Constant low physical activity                   | 508                 | 0.84 (0.71-0.99) | 430                | 1.04 (0.81-1.33) |
| BMI (kg/m <sup>2</sup> )                         |                     |                  |                    |                  |
| Constant healthy BMI <sup>d</sup>                | 722                 | 1.00             | 262                | 1.00             |
| Fluctuating status                               | 365                 | 0.98 (0.84-1.15) | 163                | 1.09 (0.88-1.35) |
| Constant unhealthy BMI                           | 721                 | 0.87 (0.76-1.00) | 419                | 1.13 (0.94-1.37) |
| WHR                                              |                     |                  |                    |                  |
| Constant healthy WHR <sup>e</sup>                | 430                 | 1.00             | 151                | 1.00             |
| Fluctuating status                               | 483                 | 0.92 (0.78-1.08) | 200                | 1.02 (0.81-1.29) |
| Constant unhealthy WHR                           | 895                 | 0.82 (0.70-0.96) | 493                | 1.14 (0.92-1.42) |

<sup>a</sup>Non-smoking refers to never smoking or having stopped for reasons other than illness.

<sup>b</sup>Heavy alcohol drinking refers to drinking  $\geq 30$  g/d of pure alcohol in men or  $\geq 15$  g/d in women or ex-drinkers.

<sup>c</sup>Being physically active refers to being sex-specific upper 50% of the physical activity level.

<sup>d</sup>Healthy BMI refers to 18.5-23.9 kg/m<sup>2</sup>.

<sup>e</sup>Healthy WHR refers to WHR  $< 0.90$  in men or  $< 0.85$  in women.

Multivariable model was adjusted for age, sex, 10 study area, education, and lifestyle changes listed in the table.

The reference group was those remain prefrail.
